# Supplementary material
Source: MDPI journal article supplement (https://www.mdpi.com/2673-4583/5/1/69)
Supplement: s1 [file s1]

**CSAC  
2021**

**The 1st International Electronic Conference on Chemical Sensors  
and Analytical Chemistry**

# **THE PERFORMANCE OF ORGANOPHOSPHATE PESTICIDES DETERMINATION USING BIOSENSOR BASED A SMALL DEVICE POTENTIOMETER AS A TRANSDUCER**

**Mashuni\*, Halimahtussaddiyah Ritonga, Muhammad Jahiding, La Ode  
Ahmad Nur Ramadhan, Desy Kurniawati and Fitri Handayani Hamid**

Department of Chemistry and Physics, Halu Oleo University, Southeast Sulawesi, Indonesia

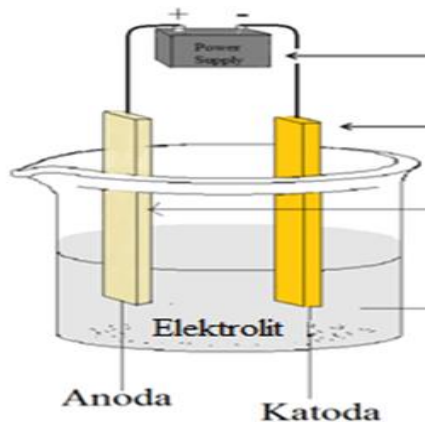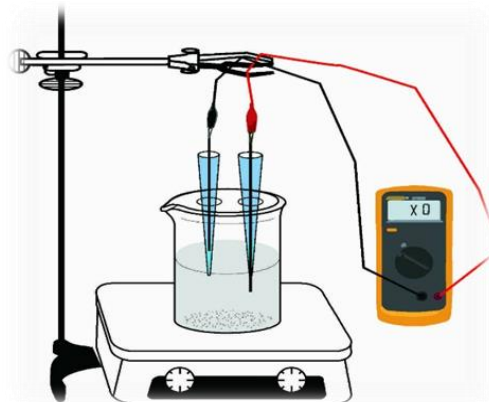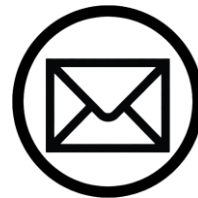

mashuni@gmail.com (M)\*  
halimahhalimah124@yahoo.co.id (H.R.)  
mjahiding2019@gmail.com (M.J.)  
ramadhan305@gmail.com (L.O.A.N.R.)  
08138372001nanda@gmail.com (D.K.)  
fitrihandayanihamid@gmail.com (F.H.H.)

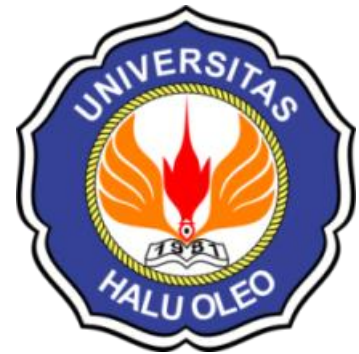

©July 1-15, 2021

# ABSTRACT

The need to control pesticide residues in foodstuffs in a fast and straightforward analysis for the field scale is required. Therefore, this research develops a transducer-based biosensor with a small device potentiometer (SDP) to produce a fast and accurate pesticide detection tool. The biosensor based on Pt/Au electrodes by immobilizing the acetylcholinesterase (AChE) enzyme coated membrane cellulose acetate (CA) 15% (w/v) cross-linked glutaraldehyde (GA) 25% (v/v) and SDP as a transducer that produces a potential value. The biosensor testing results on the organophosphate pesticide class, namely diazinon and profenofos, in which they showed the sensitivity of 21.204 and 21.035 mV.decade<sup>-1</sup>, Limit of Detection (LoD) 10<sup>-8</sup> mg.L<sup>-1</sup>, selectivity coefficient  $K_{i,j} < 1$  and accuracy of 99.497 and 94.765 %, respectively. The results showed that the biosensor connected to an SDP transducer had an excellent performance in determining the presence of organophosphate pesticides.

**Keywords:** small device potentiometer; biosensor; organophosphate; pesticide; sensitivity; limit of detection; selectivity; accuracy

**Biosensors** are “self-standing devices”, devices that record physical, chemical, or biological changes and convert them into measurable signals from the sample and monitor the analyte of interest [1,2]

Electrochemical biosensors are a subclass of chemical sensors that combine sensitivity, such as low detection limit, electrochemical transducers with the high specificity of biological recognition processes [4]

# INTRODUCTION

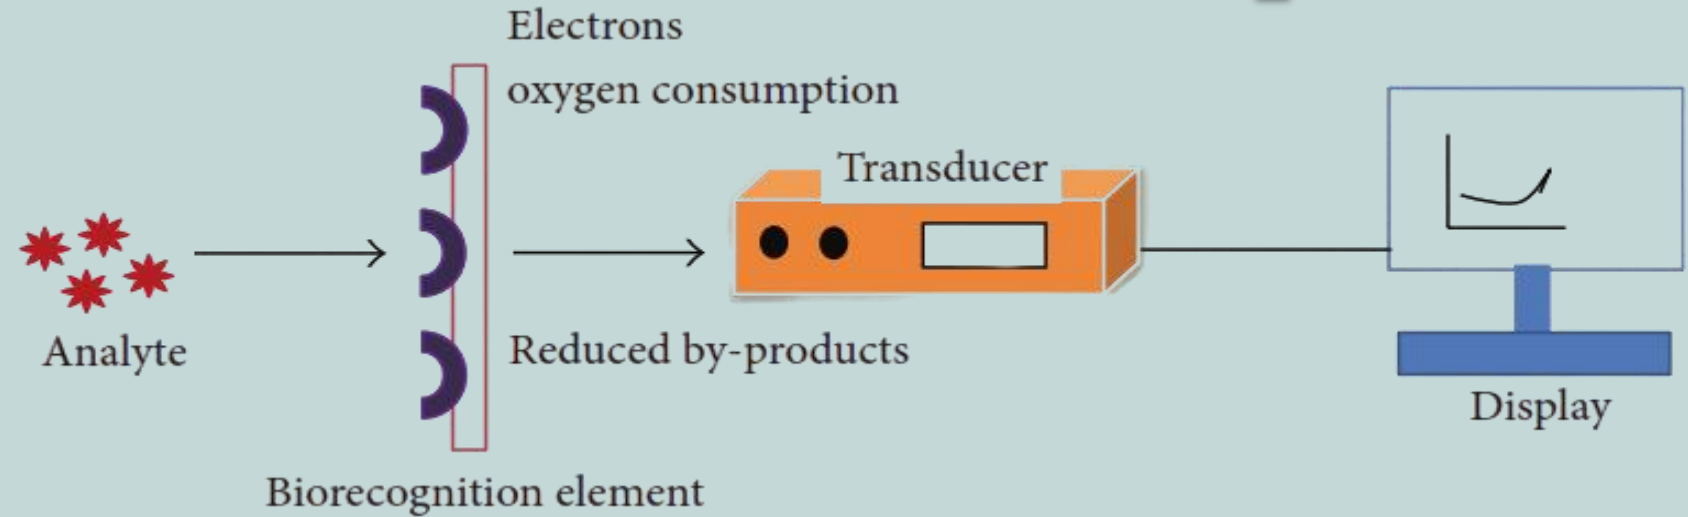

*The sensor contains a recognition element that allows a selective response to a specific analyte or group of analytes, minimizing interference from other sample components. Another significant component of a sensor is a transducer or detection device that produces a signal [3]*

## ELECTROCHEMICAL BIOSENSOR [5]

Low cost

Rapic response

Simple operation

Excellent selectivity

In-place inspections

# INTRODUCTION

The electrochemical method using measurement tools is based on potentiometric [6], amperometric [7] or conductometric [8]. Potentiometric biosensors are suitable for measuring the response value of pesticide detection measurements [9].

**Potentiometric** are efficient when used in field analysis because they are more straightforward and ideal for real-time analysis.

Pesticides were effectively detected in the range of 0.1-100 mM for parathion-methyl and methamidophos and 0.6-600 mM for Malathion. However, in the presence of higher pesticide concentrations, only partial regeneration of the enzymatic activity was regenerated [9,10].

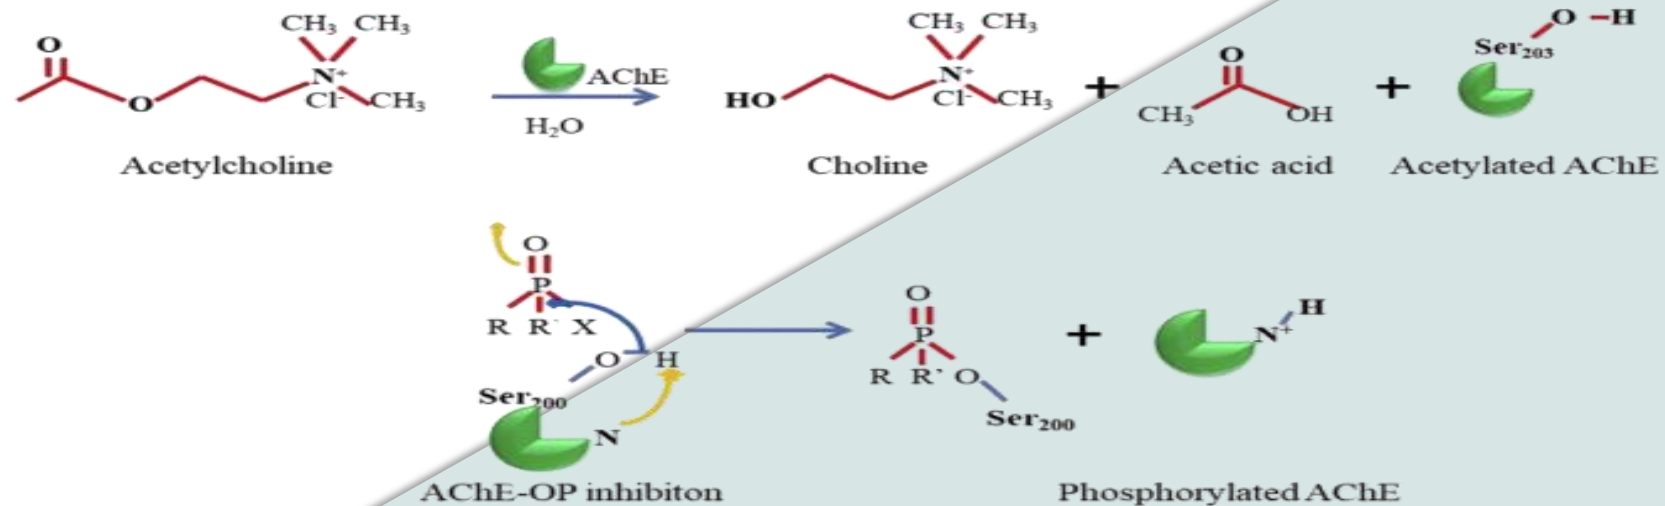

The detection system using potentiometric developed by Timur, S., & Telefoncu, A., 2004 [10], has the underlying principle of inhibition of AChE activity due to its properties in identifying organophosphate compounds.

The combination of potentiometric-based AChE enzyme biosensors as transducers with analytical techniques has been widely reported in the literature as a suitable method.

# EXPERIMENTAL

## The electrolysis process of Ag/AgCl (Mashuni et al, 2016)

## Biosensor membrane (Mashuni et al, 2016)

### Ag/AgCl electrode

Mashuni et al. 2016

Comparison of membrane composition (%)

| Cellulose Acetate (CA) | Glutaraldehyde (GA) |
|------------------------|---------------------|
| 15                     | 25                  |

### Working Electrode Design (Mashuni et al, 2016)

Dipped in cellulose acetate solution

Immersed in the GA solution for

Soaked in the for 2 × 24 h

The electrode is washed with distillation water and PB Solutions pH 8 is formed electrode membrane

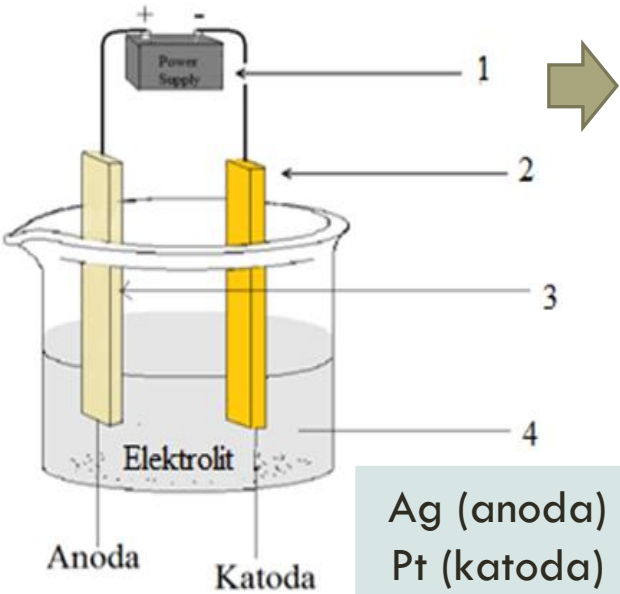

Ag (anoda)  
Pt (katoda)

1. Battery
2. Platina (Pt) wire
3. Silver (Ag) wire
4. 0.1 M KCl solution

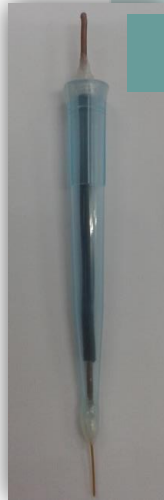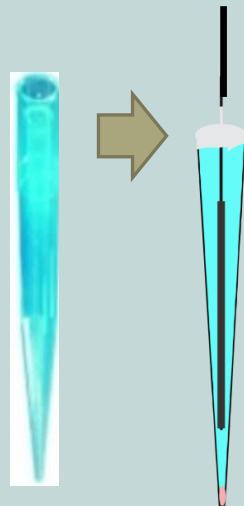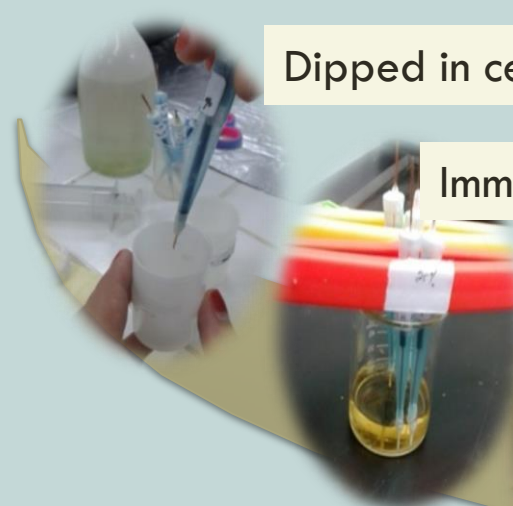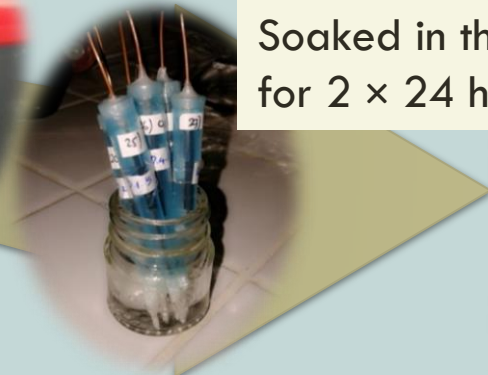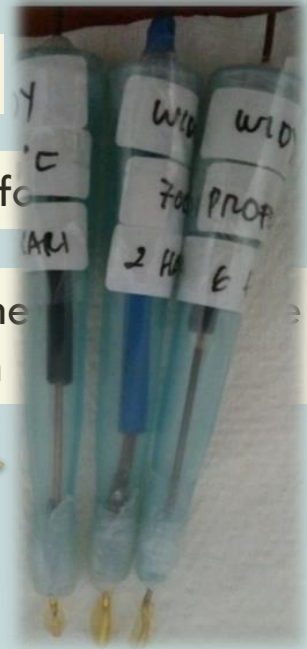

# EXPERIMENTAL

## Biosensor Performance Test

### Potentiometric biosensor equipment design

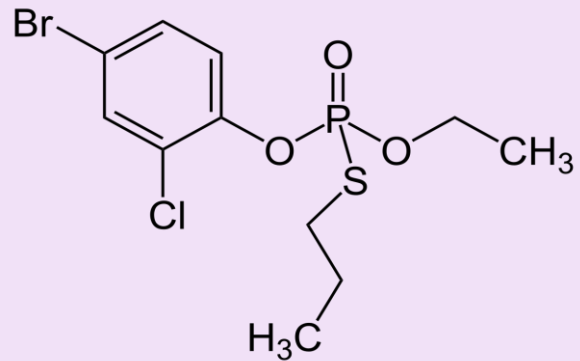

Profenofos

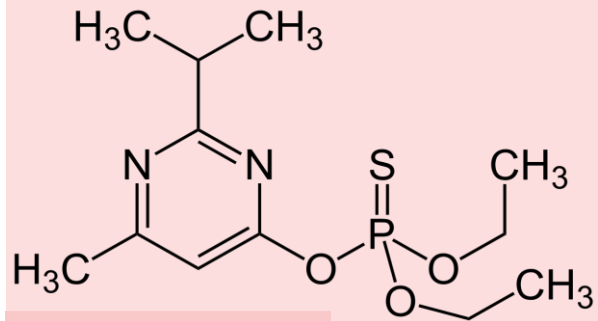

Diazinon

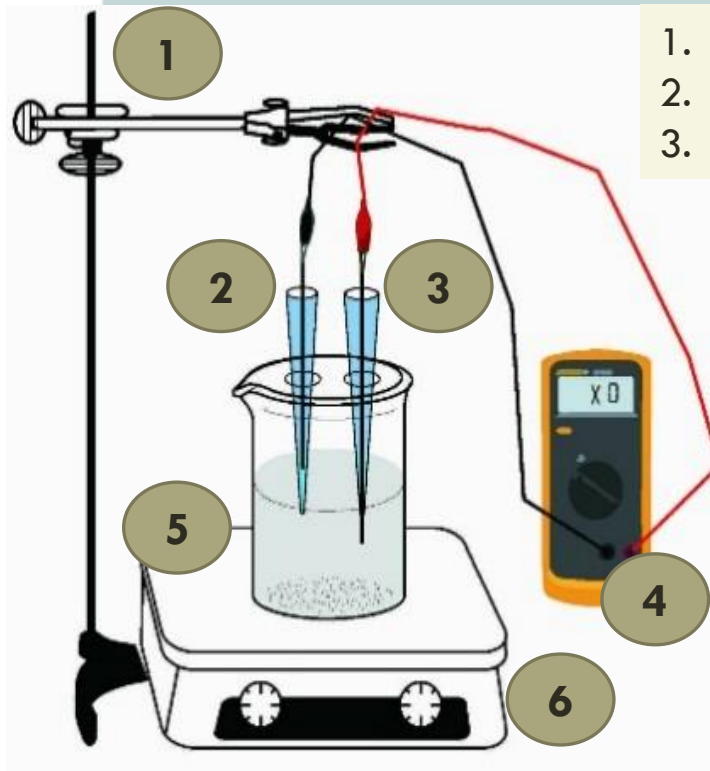

1. Stative
2. Standard electrode Ag/AgCl
3. Working Electrode

4. Potentiometer
5. ATCl Substrate  $10^{-3}$  M
6. Hot plate

Sensitivity

Limit of detection (LoD)

Selectivity

Accuracy

Pesticide concentrations are  $10^{-9}$ ,  $10^{-8}$ ,  $10^{-7}$ ,  $10^{-6}$ ,  $10^{-5}$ ,  $10^{-4}$ ,  $10^{-3}$ ,  $10^{-2}$  and  $10^{-1}$  mg.L<sup>-1</sup>

# RESULT & DISCUSSION

Measurement of potential value, sensitivity value and LoD of biosensor

| Substrate Concentration (M)                                       | Inhibitor Concentration (mg.L <sup>-1</sup> ) | Potential Value  |                  |
|-------------------------------------------------------------------|-----------------------------------------------|------------------|------------------|
|                                                                   |                                               | Diazinon         | Profenofos       |
| 10 <sup>-3</sup>                                                  | 10 <sup>-1</sup>                              | 50               | 50.7             |
|                                                                   | 10 <sup>-2</sup>                              | 64.8             | 69.3             |
|                                                                   | 10 <sup>-3</sup>                              | 89.5             | 86.1             |
|                                                                   | 10 <sup>-4</sup>                              | 121.1            | 104.2            |
|                                                                   | 10 <sup>-5</sup>                              | 135.7            | 126.5            |
|                                                                   | 10 <sup>-6</sup>                              | 159.9            | 148.7            |
|                                                                   | 10 <sup>-7</sup>                              | 175.8            | 169.4            |
|                                                                   | 10 <sup>-8</sup>                              | 192.9            | 189.6            |
| Potential value of substrate (mV)                                 |                                               | 199.8            | 195.7            |
| The reference solution (mV)                                       |                                               | 199.1            | 196,3            |
| Inhibitor Concentration, 10 <sup>-8</sup> mg.L <sup>-1</sup> (mV) |                                               | 195.5            | 194.6            |
| Sensitivity (mV.decade <sup>-1</sup> )                            |                                               | 21.204           | 21.035           |
| Linear regression equation (R <sup>2</sup> )                      |                                               | 0.992            | 0.998            |
| LoD (mg.L <sup>-1</sup> )                                         |                                               | 10 <sup>-8</sup> | 10 <sup>-8</sup> |

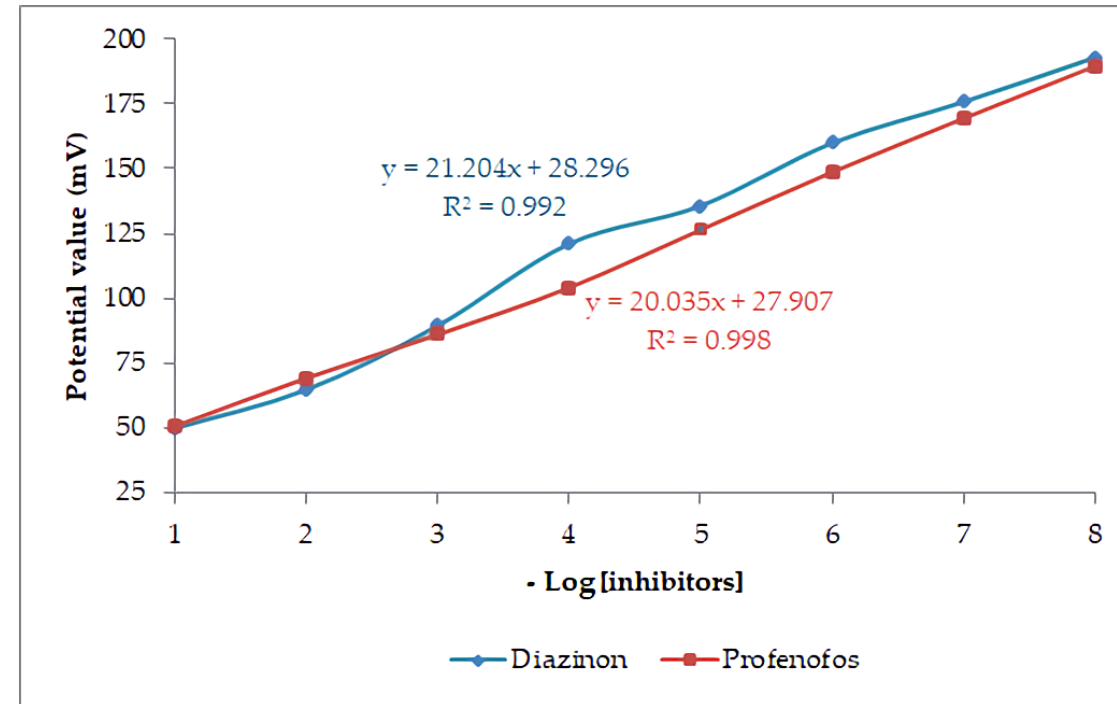

The sensitivity of the performance of SDP-based biosensors to the detection of pesticide diazinon and profenofos of 21.204 and 21.035 mV.decade<sup>-1</sup>, respectively.

The LoD value of the SDP-based biosensor as a transducer, which is 10<sup>-8</sup> mg.L<sup>-1</sup>.

# RESULT & DISCUSSION

## Selectivity of biosensor based small device potentiometric (SDP)

| $a_i$ (mg.L <sup>-1</sup> ) | $a_i$ (mg.L <sup>-1</sup> ) | Potential Value (mV) |              |              |            | $K_{i,j}$ Selectivity |              |
|-----------------------------|-----------------------------|----------------------|--------------|--------------|------------|-----------------------|--------------|
|                             |                             | $a_i$                |              | $a_i$        |            |                       |              |
|                             |                             | [diazinon]           | [profenofos] | [profenofos] | [diazinon] | [diazinon]            | [profenofos] |
| 10 <sup>-5</sup>            | 0                           | 160                  | 126.5        | 0            | 0          | 0                     | 0            |
|                             | 10 <sup>-9</sup>            |                      |              | 159.5        | 127.9      | -0.24                 | 0.64         |
|                             | 10 <sup>-8</sup>            |                      |              | 158.9        | 126.1      | -0.53                 | -0.19        |
|                             | 10 <sup>-7</sup>            |                      |              | 158.6        | 125.9      | -0.67                 | -0.29        |
|                             | 10 <sup>-6</sup>            |                      |              | 158.1        | 124.7      | -0.91                 | -0.87        |
|                             | 10 <sup>-5</sup>            |                      |              | 157.4        | 124.5      | -1.26                 | -0.96        |
| 10 <sup>-4</sup>            | 0                           | 131.1                | 104.2        | 0            | 0          | 0                     | 0            |
|                             | 10 <sup>-9</sup>            |                      |              | 130.5        | 106.3      | -0.29                 | 0.96         |
|                             | 10 <sup>-8</sup>            |                      |              | 130.1        | 105.7      | -0.48                 | 0.68         |
|                             | 10 <sup>-7</sup>            |                      |              | 129.8        | 104.8      | -0.63                 | 0.27         |
|                             | 10 <sup>-6</sup>            |                      |              | 129.5        | 103.3      | -0.77                 | -0.43        |
|                             | 10 <sup>-5</sup>            |                      |              | 129.1        | 102.2      | -0.97                 | -0.97        |
| 10 <sup>-3</sup>            | 0                           | 90                   | 80.1         | 0            | 0          | 0                     | 0            |
|                             | 10 <sup>-9</sup>            |                      |              | 89.8         | 82.2       | -0.1                  | 0.95         |
|                             | 10 <sup>-8</sup>            |                      |              | 89           | 81.9       | -0.49                 | 0.81         |
|                             | 10 <sup>-7</sup>            |                      |              | 88.7         | 80.5       | -0.63                 | 0.17         |
|                             | 10 <sup>-6</sup>            |                      |              | 88.2         | 79.6       | -0.88                 | -0.25        |
|                             | 10 <sup>-5</sup>            |                      |              | 88           | 78.1       | -0.98                 | -0.98        |

\* $a_i$  is the concentration of the analyte/main compound,  $a_j$  is the concentration of the analyte/interference compound,  $K_{i,j}$  is the selectivity coefficient

Variations in the value of  $K_{i,j}$  depend on the electrode's response and the environment of the elements in the solution. **The selectivity coefficient value obtained is smaller than +1.**

The overall values obtained for the range of concentrations of the low nuisance components are still within tolerance. The average selectivity coefficient value received still meets **the specified selectivity value standard, more excellent than -1 and more minor than +1, so  $K_{i,j} < 1$ , is a very selective electrode for pesticide detection compared to interfering compounds.**



# RESULT & DISCUSSION

## Accuracy of biosensor based *small device potentiometric (SDP)*

| [C' <sub>A</sub> ] | [C <sub>A</sub> ] | [C <sub>F</sub> ] | Potential Value (mV) |                   |                   |                    |                   |                   | Accuracy, % Recovery |            |         |
|--------------------|-------------------|-------------------|----------------------|-------------------|-------------------|--------------------|-------------------|-------------------|----------------------|------------|---------|
|                    |                   |                   | Diazinon             |                   |                   | Profenofos         |                   |                   | Diazinon             | Profenofos |         |
|                    |                   |                   | [C' <sub>A</sub> ]   | [C <sub>A</sub> ] | [C <sub>F</sub> ] | [C' <sub>A</sub> ] | [C <sub>A</sub> ] | [C <sub>F</sub> ] |                      |            |         |
| 10 <sup>-2</sup>   | 10 <sup>-3</sup>  | 10 <sup>-2</sup>  | 64.8                 | 131.1             | 79.1              | 80.4               | 118.6             | 118.6             | 76.9                 | 79.123     | 76.899  |
| 10 <sup>-3</sup>   |                   | 10 <sup>-3</sup>  | 90                   |                   | 84.8              | 118.6              |                   |                   | 99.2                 | 84.79      | 99.232  |
| 10 <sup>-4</sup>   |                   | 10 <sup>-4</sup>  | 131.1                |                   | 107.7             | 130.8              |                   |                   | 108.2                | 107.69     | 108.165 |
| Mean of % Recovery |                   |                   |                      |                   |                   |                    |                   |                   | 99.497               | 94.765     |         |

\*C'<sub>A</sub> is the concentration of analyte/compound added, CA is the concentration of the sample, CF is the total concentration of the sample obtained from the measurement

The average % recovery of the SDP-based biosensor as a transducer has an accuracy rate of 99.497 and 94.765% for diazinon and profenofos pesticide detection, respectively.

Accuracy is expressed as the % recovery of the added analyte. In general, the acceptance criteria for accuracy (% recovery) are 80-110%

Based on the results and data obtained from the study of SDP-based biosensors as transducers in the detection of organophosphate pesticides, the sensitivity was **21,204** and **21,035 mV/decade**, **LoD 10<sup>-8</sup> mg L<sup>-1</sup>**, selectivity coefficient  **$K_{i,j} < 1$**  and accuracy of **99,497** and **94.765%**. Thus, potentiometric biosensors with CA and GA membranes immobilized by AChE enzymes have good sensitivity, selectivity and accuracy in detecting the presence of organophosphate pesticides in a sample and LoD from tiny biosensors is effective for detecting at low scale and concentration.

## CONCLUSION

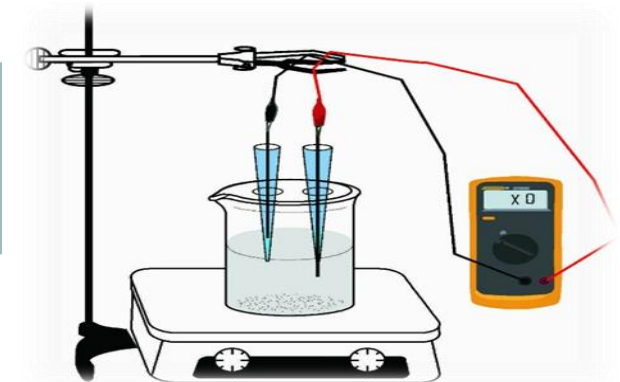

# REFERENCES

1. Ronkainen NJ, Halsall HB, Heineman WR. Electrochemical biosensors. *Chem Soc Rev.* 2010;39(5):1747-1763. doi:10.1039/b714449k
2. Bacciu A, Arrigo P, Delogu G, et al. A new perspective on using glycols in glutamate biosensor design: From stabilizing agents to a new containment net. *Chemosensors.* 2020;8(23):1-16. doi:10.3390/CHEMOSENSORS8020023
3. Eggins BR. *Chemical Sensors.* England: Johiley & Sons, 2002. doi:10.1007/s40828-017-0052-x
4. Joseph W. *Analytical Electrochemistry.* 3rd ed. New Jersey: John Wiley & Sons, 2006.
5. Jaffrezic-renault N. New trends in biosensors for organophosphorus pesticides. *Sensors.* 2001;12:60-74. doi:10.3390/s10100060
6. Du D, Huang X, Cai J, Zhang A. Amperometric detection of triazophos pesticide using acetylcholinesterase biosensor based on multiwall carbon nanotube-chitosan matrix. *Sensors Actuators, B Chem.* 2007;127(2):531-535. doi:10.1016/j.snb.2007.05.006
7. Simonian AL, Good TA, Wang SS, Wild JR. Nanoparticle-based optical biosensors for the direct detection of organophosphate chemical warfare agents and pesticides. *Anal Chim Acta.* 2005;534(1):69-77. doi:10.1016/j.aca.2004.06.056
8. Shokoufeh H, Saeideh M, Faezeh V, Salek Armin, Maghsoudi Mohammad Reza, Ganjali, Parviz N, Abdollahi M. Biosensors and their applications in detection of organophosphorus pesticides in the environment. *Arch Toxicol.* 2017;91(1):109-130. doi:10.1007/s00204-016-1875-8
9. Mashuni, Ritonga H, Hamid FH, Widiyani M, Jahiding M. Analysis of bio-oil effectiveness from coconut shells pyrolysis as biopesticide by potentiometric biosensor. *J Phys.* 2021;1825(1):1-6. doi:10.1088/1742-6596/1825/1/012095
10. Timur S, Telefoncu A. Acetylcholinesterase (AChE) electrodes based on gelatin and chitosan matrices for the pesticide detection. *Artificial Cells, Blood Substitutes, Biotechnol.* 2004;32(3):427-442. doi:10.1081/bio-200027497
11. Mashuni, Syahrul M, Ahmad A, Wahab AW. Pengaruh konsentrasi glutaraldehid pada komposisi membran elektroda biosensor pestisida karbamat. *Indones Chim Acta.* 2010;3(1):8-14.

**Funding:** The authors thank the University of Halu Oleo (UHO) and Ministry of Research and Technology of the Republic of Indonesia (RISTEK-BRIN) for funding.

**Acknowledgments:** The authors thank all the team for their contribution to this research, Uni University of Halu Oleo (UHO) and Ministry of Research and Technology of the Republic of Indonesia (RISTEK-BRIN).

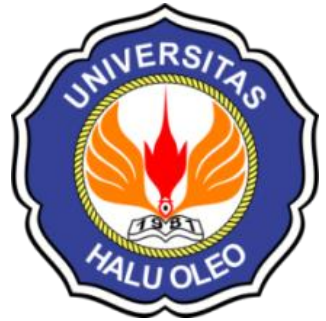

# Thank you

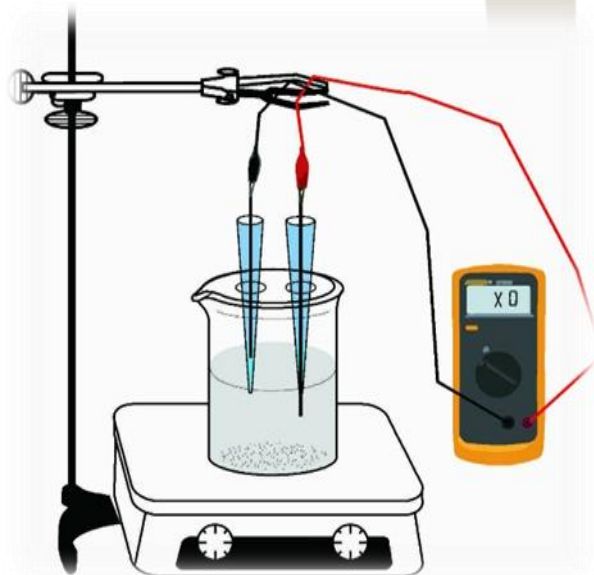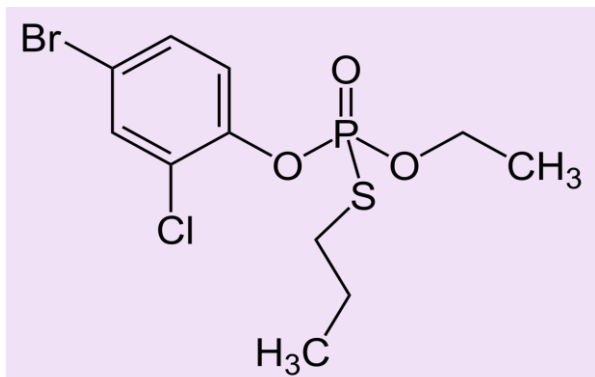

Profenofos

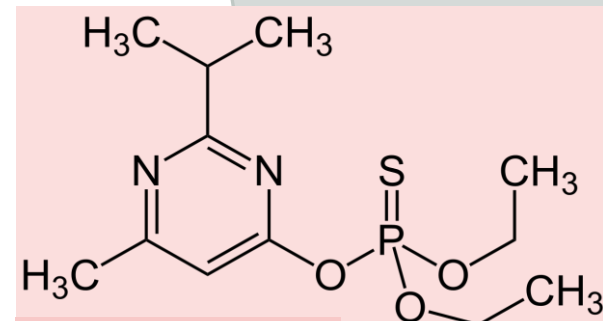

Diazinon
